# Supplementary material for: Protein kinase C-delta regulates HIV-1 replication at an early post-entry step in macrophages
Source: PubMed Central journal article supplement (PMC3432598; doi:10.1186/1742-4690-9-37), 2012-05-03
Supplement: 1742-4690-9-37-S3.pdf [file 1742-4690-9-37-S3.pdf]

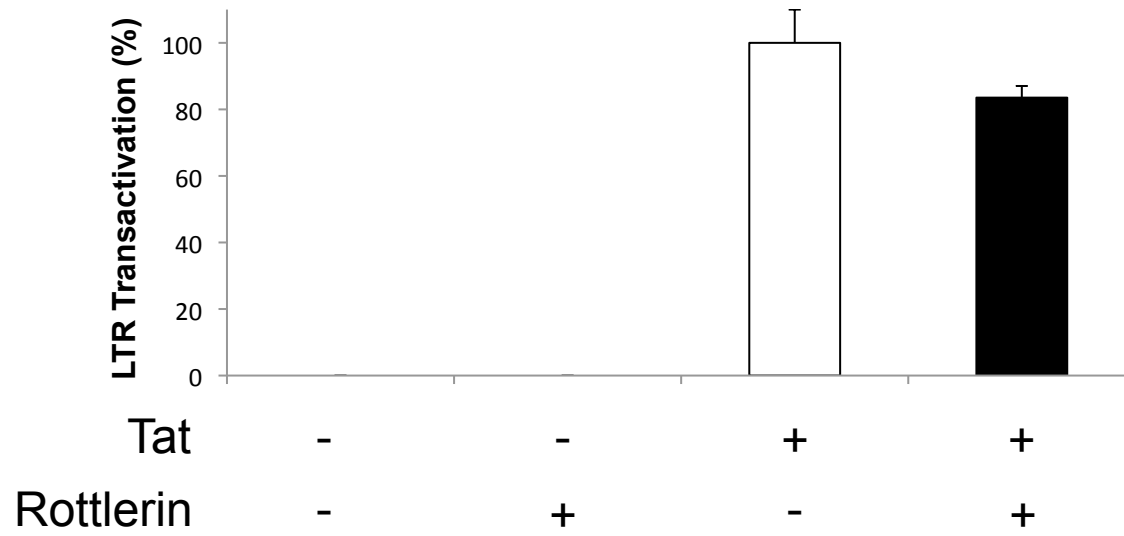

Supplementary figure 3
